# Supplementary material for: CC chemokine receptor 2 mediated regulation of macrophages is involved in pancreatic cancer progression in the tumor microenvironment
Source: Research Square preprint supplement (doi:10.21203/rs.3.rs-5124479/v1), 2024-10-18
Supplement: Supplementary file 1 [file e9af4ff72740faf562521807.xlsx]

## Sheet: CCR2
Sample Name	Target Name	Cт
CCR2 WT Macrophage	HPRT1	20.6556
CCR2 WT Macrophage	HPRT1	20.6581
CCR2 WT Macrophage	HPRT1	20.6818
CCR2 WT Macrophage	CCR2	27.9045
CCR2 WT Macrophage	CCR2	26.8453
CCR2 WT Macrophage	CCR2	26.9996
CCR2 KO Macrophage	HPRT1	20.9657
CCR2 KO Macrophage	HPRT1	20.9342
CCR2 KO Macrophage	HPRT1	20.9089
CCR2 KO Macrophage	CCR2	Undetermined
CCR2 KO Macrophage	CCR2	Undetermined
CCR2 KO Macrophage	CCR2	37.0413

## Sheet: CXCL2
Sample Name	Target Name	Cт
CCR2 WT Macrophage	Bactin	16.5156
CCR2 WT Macrophage	Bactin	16.4262
CCR2 KO Macrophage	Bactin	15.9331
CCR2 KO Macrophage	Bactin	15.9735
CCR2 WT Macrophage	CXCL2	24.9143
CCR2 WT Macrophage	CXCL2	24.7891
CCR2 KO Macrophage	CXCL2	25.5445
CCR2 KO Macrophage	CXCL2	25.6753
Sample Name	Target Name	Cт
CCR2 WT Macrophage	HPRT1	20.6583
CCR2 WT Macrophage	HPRT1	20.6691
CCR2 KO Macrophage	HPRT1	20.9512
CCR2 KO Macrophage	HPRT1	20.9661
CCR2 WT Macrophage	CXCL2	26.8999
CCR2 WT Macrophage	CXCL2	26.8942
CCR2 KO Macrophage	CXCL2	27.9129
CCR2 KO Macrophage	CXCL2	27.8279

## Sheet: CXCL4
Sample Name	Target Name	Cт
CCR2 WT Macrophage	Bactin	16.5036
CCR2 WT Macrophage	Bactin	16.4101
CCR2 KO Macrophage	Bactin	15.9246
CCR2 KO Macrophage	Bactin	15.9758
CCR2 WT Macrophage	CXCL4	21.8878
CCR2 WT Macrophage	CXCL4	21.9593
CCR2 KO Macrophage	CXCL4	22.9158
CCR2 KO Macrophage	CXCL4	22.8808
Sample Name	Target Name	Cт
CCR2 WT Macrophage	HPRT1	20.6583
CCR2 WT Macrophage	HPRT1	20.6691
CCR2 KO Macrophage	HPRT1	20.9512
CCR2 KO Macrophage	HPRT1	20.9661
CCR2 WT Macrophage	CXCL4	22.8394
CCR2 WT Macrophage	CXCL4	22.7915
CCR2 KO Macrophage	CXCL4	23.7975
CCR2 KO Macrophage	CXCL4	23.7778

## Sheet: CXCL5
Sample Name	Target Name	Cт
CCR2 WT Macrophage	Bactin	16.5156
CCR2 WT Macrophage	Bactin	16.4262
CCR2 KO Macrophage	Bactin	15.9331
CCR2 KO Macrophage	Bactin	15.9735
CCR2 WT Macrophage	CXCL5	29.2073
CCR2 WT Macrophage	CXCL5	29.2412
CCR2 KO Macrophage	CXCL5	29.9604
CCR2 KO Macrophage	CXCL5	29.9158
Sample Name	Target Name	Cт
CCR2 WT Macrophage	HPRT1	20.6583
CCR2 WT Macrophage	HPRT1	20.6691
CCR2 KO Macrophage	HPRT1	20.9512
CCR2 KO Macrophage	HPRT1	20.9661
CCR2 WT Macrophage	CXCL5	30.0903
CCR2 WT Macrophage	CXCL5	30.0639
CCR2 KO Macrophage	CXCL5	30.9762
CCR2 KO Macrophage	CXCL5	31.2327

## Sheet: Osteopontin
Sample Name	Target Name	Cт
CCR2 WT Macrophage	Bactin	16.5036
CCR2 WT Macrophage	Bactin	16.4101
CCR2 KO Macrophage	Bactin	15.9246
CCR2 KO Macrophage	Bactin	15.9758
CCR2 WT Macrophage	Osteopontin	24.8943
CCR2 WT Macrophage	Osteopontin	24.9482
CCR2 KO Macrophage	Osteopontin	26.8701
CCR2 KO Macrophage	Osteopontin	26.9121
Sample Name	Target Name	Cт
CCR2 WT Macrophage	HPRT1	20.6583
CCR2 WT Macrophage	HPRT1	20.6691
CCR2 KO Macrophage	HPRT1	20.9512
CCR2 KO Macrophage	HPRT1	20.9661
CCR2 WT Macrophage	Osteopontin	25.8237
CCR2 WT Macrophage	Osteopontin	25.7749
CCR2 KO Macrophage	Osteopontin	27.9432
CCR2 KO Macrophage	Osteopontin	27.8954

## Sheet: Osteoactin
Sample Name	Target Name	Cт
CCR2 WT Macrophage	Bactin	16.5036
CCR2 WT Macrophage	Bactin	16.4101
CCR2 KO Macrophage	Bactin	15.9246
CCR2 KO Macrophage	Bactin	15.9758
CCR2 WT Macrophage	Osteoactin	19.882
CCR2 WT Macrophage	Osteoactin	19.9252
CCR2 KO Macrophage	Osteoactin	20.6469
CCR2 KO Macrophage	Osteoactin	20.7356
Sample Name	Target Name	Cт
CCR2 WT Macrophage	HPRT1	20.6583
CCR2 WT Macrophage	HPRT1	20.6691
CCR2 KO Macrophage	HPRT1	20.9512
CCR2 KO Macrophage	HPRT1	20.9661
CCR2 WT Macrophage	ACTIVE	20.8968
CCR2 WT Macrophage	ACTIVE	20.8418
CCR2 KO Macrophage	ACTIVE	21.6751
CCR2 KO Macrophage	ACTIVE	21.6089

## Sheet: TGFBR2
Sample Name	Target Name	Cт
CCR2 WT Macrophage	Bactin	16.5156
CCR2 WT Macrophage	Bactin	16.4262
CCR2 KO Macrophage	Bactin	15.9331
CCR2 KO Macrophage	Bactin	15.9735
CCR2 WT Macrophage	TGFB2	30.1896
CCR2 WT Macrophage	TGFB2	30.002
CCR2 KO Macrophage	TGFB2	31.8979
CCR2 KO Macrophage	TGFB2	31.249
Sample Name	Target Name	Cт
CCR2 WT Macrophage	Bactin	16.5036
CCR2 WT Macrophage	Bactin	16.4101
CCR2 KO Macrophage	Bactin	15.9246
CCR2 KO Macrophage	Bactin	15.9758
CCR2 WT Macrophage	TGFB2	30.8881
CCR2 WT Macrophage	TGFB2	30.7656
CCR2 KO Macrophage	TGFB2	31.9413
CCR2 KO Macrophage	TGFB2	32.5399

## Sheet: IL1a
Sample Name	Target Name	Cт
CCR2 WT Macrophage	Bactin	16.2562
CCR2 WT Macrophage	Bactin	16.2134
CCR2 KO Macrophage	Bactin	15.9523
CCR2 KO Macrophage	Bactin	15.9187
CCR2 WT Macrophage	IL1A	28.4256
CCR2 WT Macrophage	IL1A	28.2974
CCR2 KO Macrophage	IL1A	30.4203
CCR2 KO Macrophage	IL1A	30.9169
Sample Name	Target Name	Cт
CCR2 WT Macrophage	HPRT1	20.6583
CCR2 WT Macrophage	HPRT1	20.6691
CCR2 KO Macrophage	HPRT1	20.9512
CCR2 KO Macrophage	HPRT1	20.9661
CCR2 WT Macrophage	IL1A	29.7829
CCR2 WT Macrophage	IL1A	29.7653
CCR2 KO Macrophage	IL1A	33.2316
CCR2 KO Macrophage	IL1A	32.7884

## Sheet: VE Cadherin
Sample Name	Target Name	Cт
CCR2 WT Macrophage	Bactin	16.2562
CCR2 WT Macrophage	Bactin	16.2134
CCR2 KO Macrophage	Bactin	15.9523
CCR2 KO Macrophage	Bactin	15.9187
CCR2 WT Macrophage	VE Cadherin	29.6391
CCR2 WT Macrophage	VE Cadherin	29.5118
CCR2 KO Macrophage	VE Cadherin	30.7053
CCR2 KO Macrophage	VE Cadherin	30.925
Sample Name	Target Name	Cт
CCR2 WT Macrophage	HPRT1	20.6583
CCR2 WT Macrophage	HPRT1	20.6691
CCR2 KO Macrophage	HPRT1	20.9512
CCR2 KO Macrophage	HPRT1	20.9661
CCR2 WT Macrophage	VE	28.8479
CCR2 WT Macrophage	VE	28.9122
CCR2 KO Macrophage	VE	30.9126
CCR2 KO Macrophage	VE	30.8695

## Sheet: CCL2
Sample Name	Target Name	Cт
Control	Bactin	16.631
Control	Bactin	16.649
Condition medium	Bactin	17.1167
Condition medium	Bactin	17.0259
Control	CCL2	23.5669
Control	CCL2	23.5916
Condition medium	CCL2	23.4115
Condition medium	CCL2	23.3326
Sample Name	Target Name	Cт
Control	GAPDH	24.0025
Control	GAPDH	24.2682
Condition medium	GAPDH	24.5352
Condition medium	GAPDH	24.442
Control	CCL2	28.488
Control	CCL2	28.3559
Condition medium	CCL2	27.9022
Condition medium	CCL2	27.9651

[truncated: 5 more sheets: CCL7, IFN1, IFN4, IFN12, IFNB]
